# Supplementary material for: Lanthanide diphosphonates based on a V-shaped ligand: syntheses, structures, experimental and theoretical luminescence properties
Source: Royal Society of Chemistry journal article supplement (doi:10.1039/c5ce01366f), 2015-01-01
Supplement: c5ce01366f1.pdf [file c5ce01366f1.pdf]

Supporting information

**Lanthanide Diphosphonates Based on V-shaped Rigid Ligand: Syntheses,  
Structures, Experimental and Theoretical Luminescence Properties.**

Si-Fu Tang and Xuebing Li

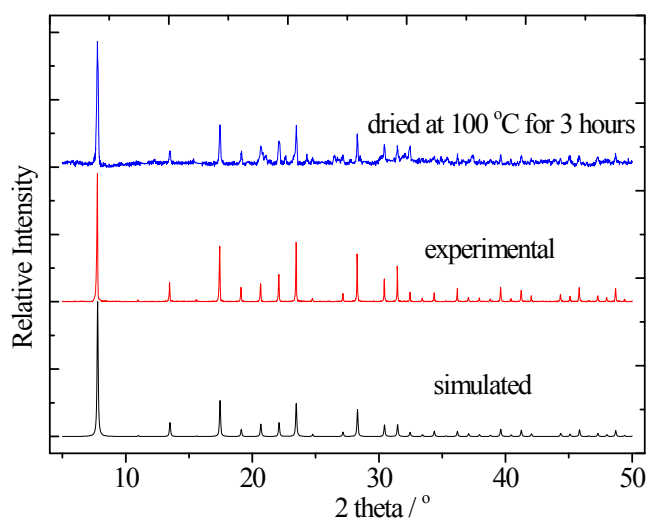

Figure S1. Comparison of simulated and experimental PXRD diagrams of compound

**1.**

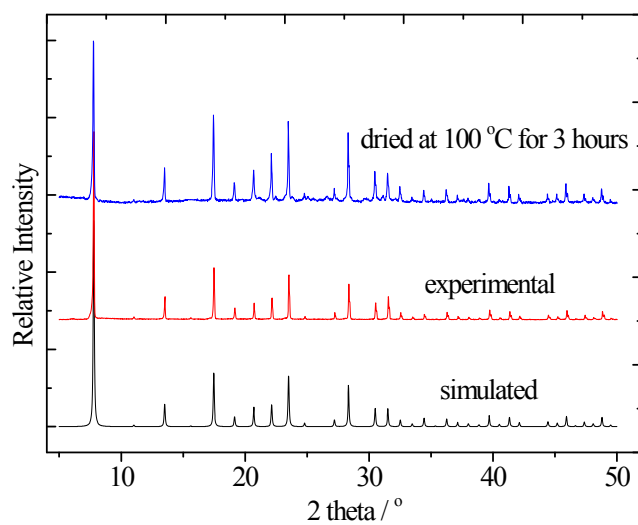

Figure S2. Comparison of simulated and experimental PXRD diagrams of compound

2.

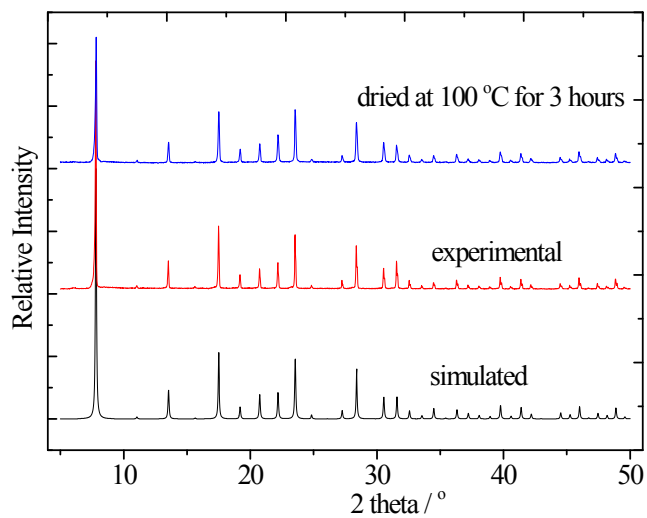

Figure S3. Comparison of simulated and experimental PXR diagrams of compound

3.

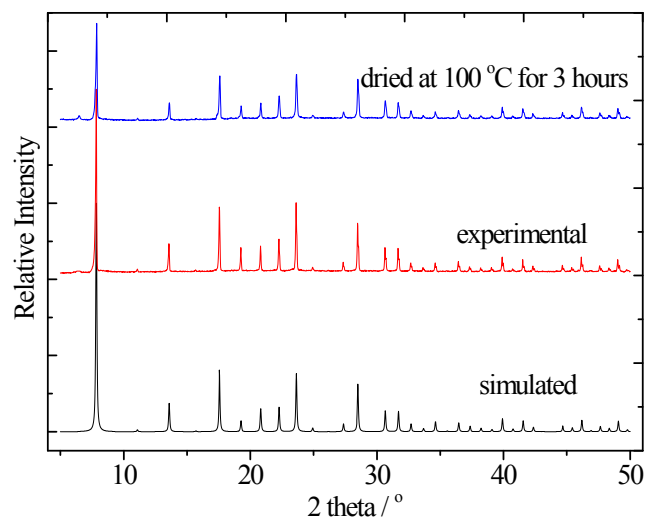

Figure S4. Comparison of simulated and experimental PXR diagrams of compound

4.

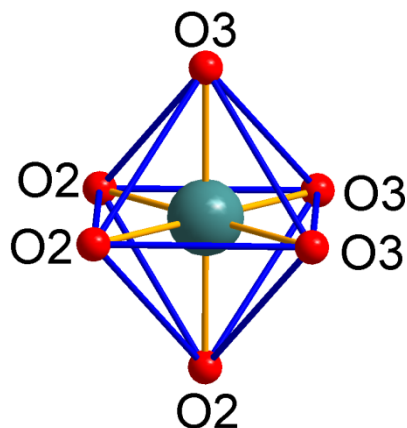

Figure S5. Coordination environment in compounds 1-4.

Table S1. Selected angles found in compounds 1-4.

| Compound 1          |           | Compound 2          |           |
|---------------------|-----------|---------------------|-----------|
| O(2)-Eu(1)-O(2)#1   | 89.90(7)  | O(2)-Gd(1)-O(2)#1   | 90.52(6)  |
| O(2)-Eu(1)-O(2)#2   | 89.90(7)  | O(2)-Gd(1)-O(2)#2   | 90.52(6)  |
| O(2)#1-Eu(1)-O(2)#2 | 89.90(7)  | O(2)#1-Gd(1)-O(2)#2 | 90.52(6)  |
| O(2)-Eu(1)-O(3)#3   | 89.80(7)  | O(2)-Gd(1)-O(3)#3   | 89.10(6)  |
| O(2)#1-Eu(1)-O(3)#3 | 179.70(7) | O(2)#1-Gd(1)-O(3)#3 | 179.21(6) |
| O(2)#2-Eu(1)-O(3)#3 | 90.12(7)  | O(2)#2-Gd(1)-O(3)#3 | 90.18(6)  |
| O(2)-Eu(1)-O(3)#4   | 179.70(7) | O(2)-Gd(1)-O(3)#4   | 179.20(6) |
| O(2)#1-Eu(1)-O(3)#4 | 90.12(7)  | O(2)#1-Gd(1)-O(3)#4 | 90.18(6)  |
| O(2)#2-Eu(1)-O(3)#4 | 89.80(7)  | O(2)#2-Gd(1)-O(3)#4 | 89.10(6)  |
| O(3)#3-Eu(1)-O(3)#4 | 90.17(7)  | O(3)#3-Gd(1)-O(3)#4 | 90.20(6)  |
| O(2)-Eu(1)-O(3)#5   | 90.12(7)  | O(2)-Gd(1)-O(3)#5   | 90.18(6)  |
| O(2)#1-Eu(1)-O(3)#5 | 89.80(7)  | O(2)#1-Gd(1)-O(3)#5 | 89.10(6)  |
| O(2)#2-Eu(1)-O(3)#5 | 179.70(7) | O(2)#2-Gd(1)-O(3)#5 | 179.21(6) |
| O(3)#3-Eu(1)-O(3)#5 | 90.17(7)  | O(3)#3-Gd(1)-O(3)#5 | 90.20(6)  |
| O(3)#4-Eu(1)-O(3)#5 | 90.17(7)  | O(3)#4-Gd(1)-O(3)#5 | 90.20(6)  |
| Compound 3          |           | Compound 4          |           |
| O(2)#1-Tb(1)-O(2)#2 | 90.60(9)  | O(2)-Dy(1)-O(2)#1   | 90.78(5)  |
| O(2)#1-Tb(1)-O(2)   | 90.60(9)  | O(2)-Dy(1)-O(2)#2   | 90.78(5)  |
| O(2)#2-Tb(1)-O(2)   | 90.60(9)  | O(2)#1-Dy(1)-O(2)#2 | 90.78(5)  |
| O(2)#1-Tb(1)-O(3)#3 | 178.76(9) | O(2)-Dy(1)-O(3)#3   | 88.70(5)  |
| O(2)#2-Tb(1)-O(3)#3 | 88.81(9)  | O(2)#1-Dy(1)-O(3)#3 | 178.86(5) |
| O(2)-Tb(1)-O(3)#3   | 90.49(10) | O(2)#2-Dy(1)-O(3)#3 | 90.24(5)  |
| O(2)#1-Tb(1)-O(3)#4 | 90.50(10) | O(2)-Dy(1)-O(3)#4   | 178.86(5) |
| O(2)#2-Tb(1)-O(3)#4 | 178.76(9) | O(2)#1-Dy(1)-O(3)#4 | 90.24(5)  |
| O(2)-Tb(1)-O(3)#4   | 88.81(9)  | O(2)#2-Dy(1)-O(3)#4 | 88.70(5)  |
| O(3)#3-Tb(1)-O(3)#4 | 90.10(9)  | O(3)#3-Dy(1)-O(3)#4 | 90.29(5)  |

|                     |            |                     |           |
|---------------------|------------|---------------------|-----------|
| O(2)#1-Tb(1)-O(3)#5 | 88.81(9)   | O(2)-Dy(1)-O(3)#5   | 90.25(5)  |
| O(2)#2-Tb(1)-O(3)#5 | 90.50(10)  | O(2)#1-Dy(1)-O(3)#5 | 88.70(5)  |
| O(2)-Tb(1)-O(3)#5   | 178.76(10) | O(2)#2-Dy(1)-O(3)#5 | 178.86(5) |
| O(3)#3-Tb(1)-O(3)#5 | 90.10(9)   | O(3)#3-Dy(1)-O(3)#5 | 90.29(5)  |
| O(3)#4-Tb(1)-O(3)#5 | 90.10(9)   | O(3)#4-Dy(1)-O(3)#5 | 90.29(5)  |

Symmetry transformations used to generate equivalent atoms: For **1**: #1  $z+1, x, y-1$ ; #2  $y, z+1, x-1$ ; #3  $x+0, -y+2, -z+1/2$ ; #4  $-y+2, -z+3/2, x-1$ ; #5  $-z+3/2, x+0, -y+1$ ; #6  $-x+5/2, y+0, -z+0$ . For **2**: #1  $z+1, x, y-1$ ; #2  $y, z+1, x-1$ ; #3  $x+0, -y+2, -z+1/2$ ; #4  $-y+2, -z+3/2, x-1$ ; #5  $-z+3/2, x+0, -y+1$ ; #6  $-x+5/2, y+0, -z+0$ . For **3**: #1  $y, z-1, x+1$ ; #2  $z-1, x, y+1$ ; #3  $x+0, -y+0, -z+3/2$ ; #4  $-z+1/2, x+0, -y+1$ ; #5  $-y+0, -z+1/2, x+1$ ; #6  $-x-1/2, y+0, -z+2$ . For **4**: #1  $z+1, x, y-1$ ; #2  $y, z+1, x-1$ ; #3  $-z+3/2, x+0, -y+1$ ; #4  $-y+2, -z+3/2, x-1$ ; #5  $x+0, -y+2, -z+1/2$ ; #6  $-x+5/2, y+0, -z+0$ .

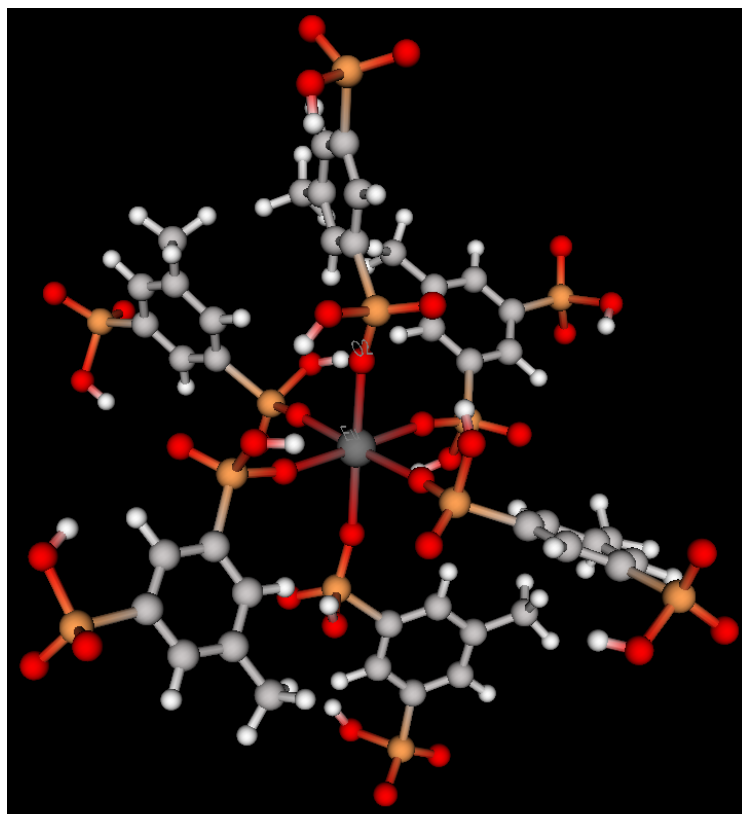

Figure S6. Optimized geometry using sparkle PM3 implemented in the MOPAC 2012
